# Supplementary material
Source: PubMed Central journal article supplement (PMC7747277)
Supplement: 40820_2017_178_MOESM1_ESM.pdf [file 40820_2017_178_MOESM1_ESM.pdf]

Supporting Information for

## A CuNi/C Nanosheet Array Based on Metal-Organic Framework Derivate as a Supersensitive Non-Enzymatic Glucose Sensor

Li Zhang<sup>1</sup>, Chen Ye<sup>1</sup>, Xu Li<sup>2</sup>, Yaru Ding<sup>1</sup>, Hongbo Liang<sup>1</sup>, Guangyu Zhao<sup>1</sup>, Yan Wang<sup>1,\*</sup>

<sup>1</sup>School of Chemistry and Chemical Engineering, Harbin Institute of Technology, Harbin, Heilongjiang 150080, People's Republic of China

<sup>2</sup>Department of Ophthalmology, the Second Hospital, Jilin University, Changchun, Jilin 130022, People's Republic of China

\*Corresponding author. E-mail: wangy\_msn@hit.edu.cn

Tel/Fax: +86 451 86403719

### Figures

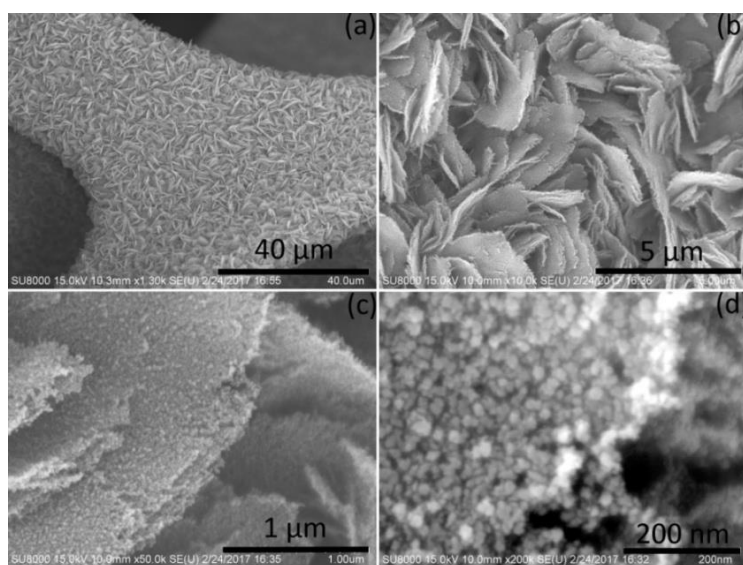

**Fig. S1** SEM images of Ni/C nanosheet arrays derived from Ni-MOFs

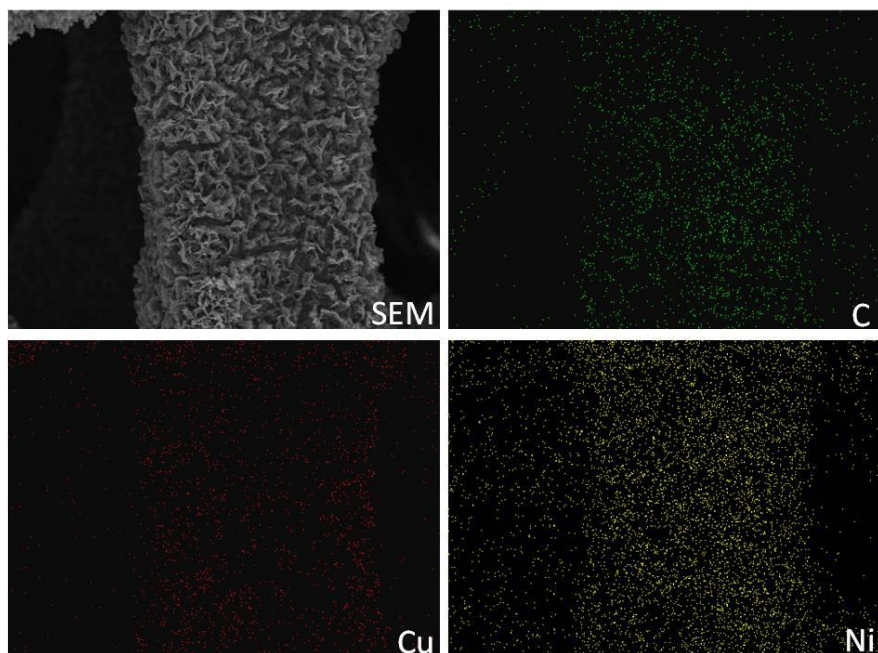

**Fig. S2** Element mapping from EDS test

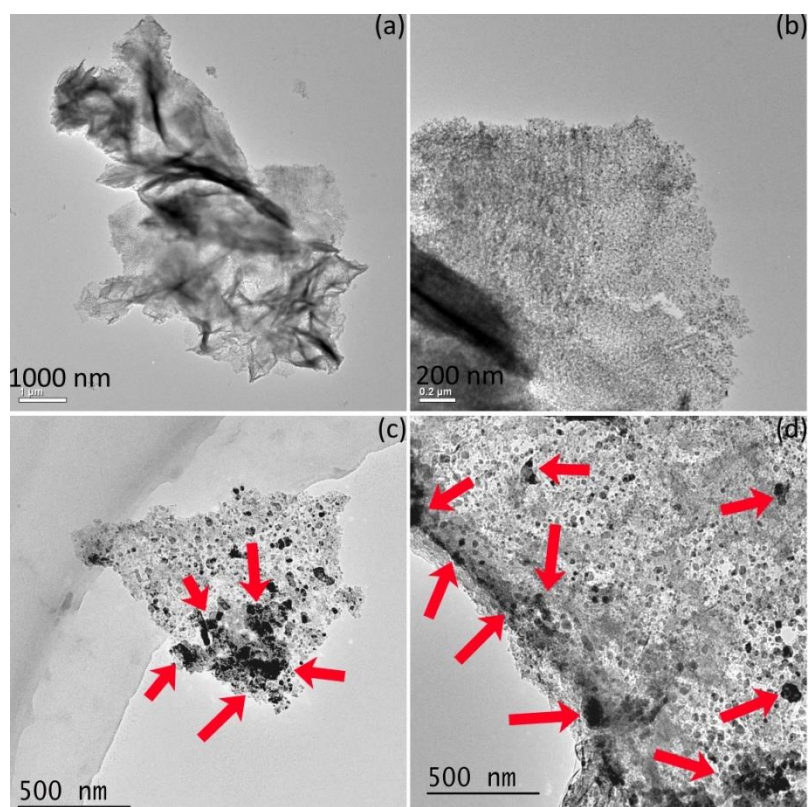

**Fig. S3** TEM images of **a, b** Ni/C and **c, d** CuNi/C nanosheets. Cu nanoparticles are pointed by red arrows.....

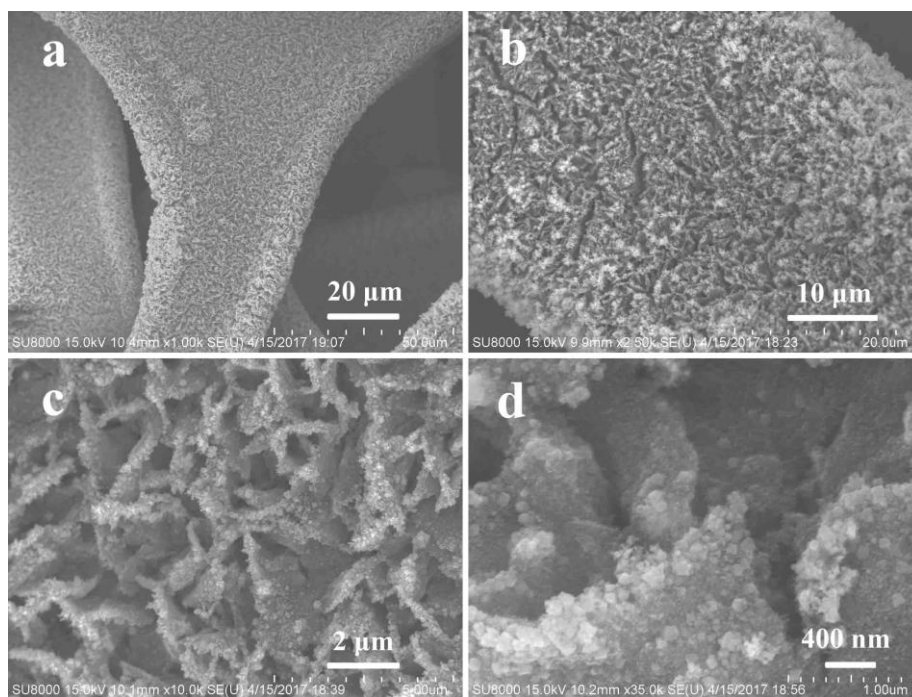

**Fig. S4** SEM images of CuNi/C electrodes prepared by depositing Cu with 20 s

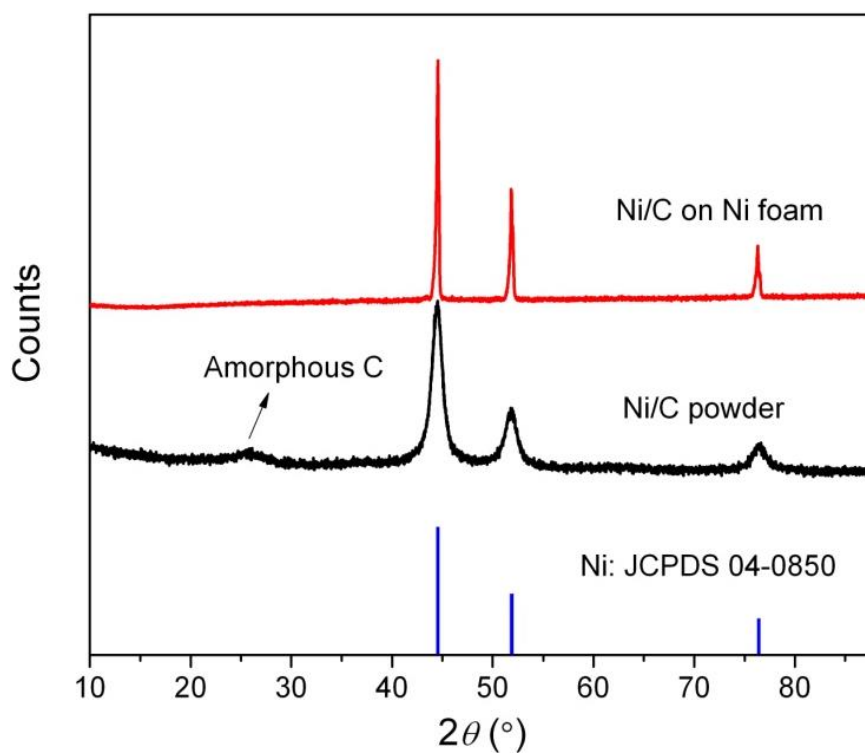

**Fig. S5** XRD patterns of Ni/C on Ni foam and Ni/C powder

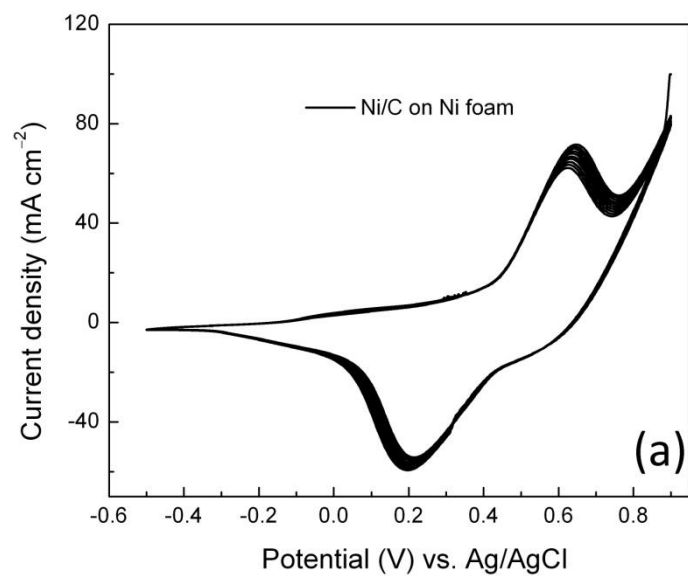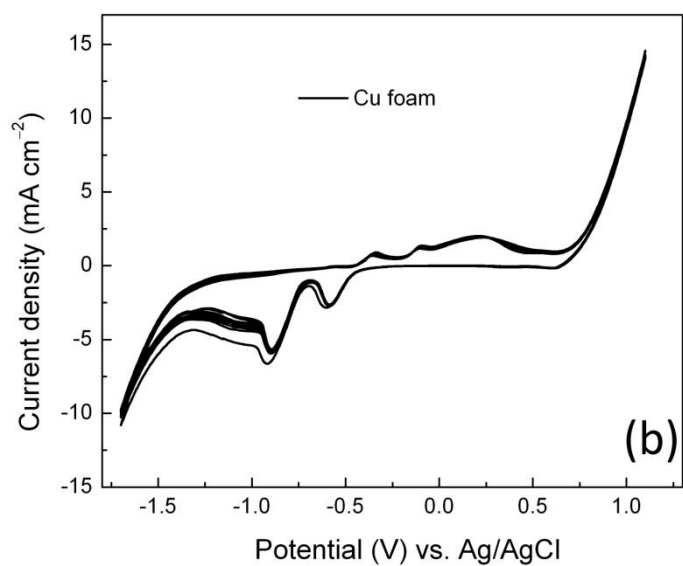

**Fig. S6** CV curves of **a** Ni/C on Ni foam and **b** raw Cu foam in 0.1 M NaOH. The CV measurements were carried out in a three-electrode system using Pt foil as counter electrode, an Ag/AgCl as reference electrode. The scan rate is  $20 \text{ mV s}^{-1}$ .

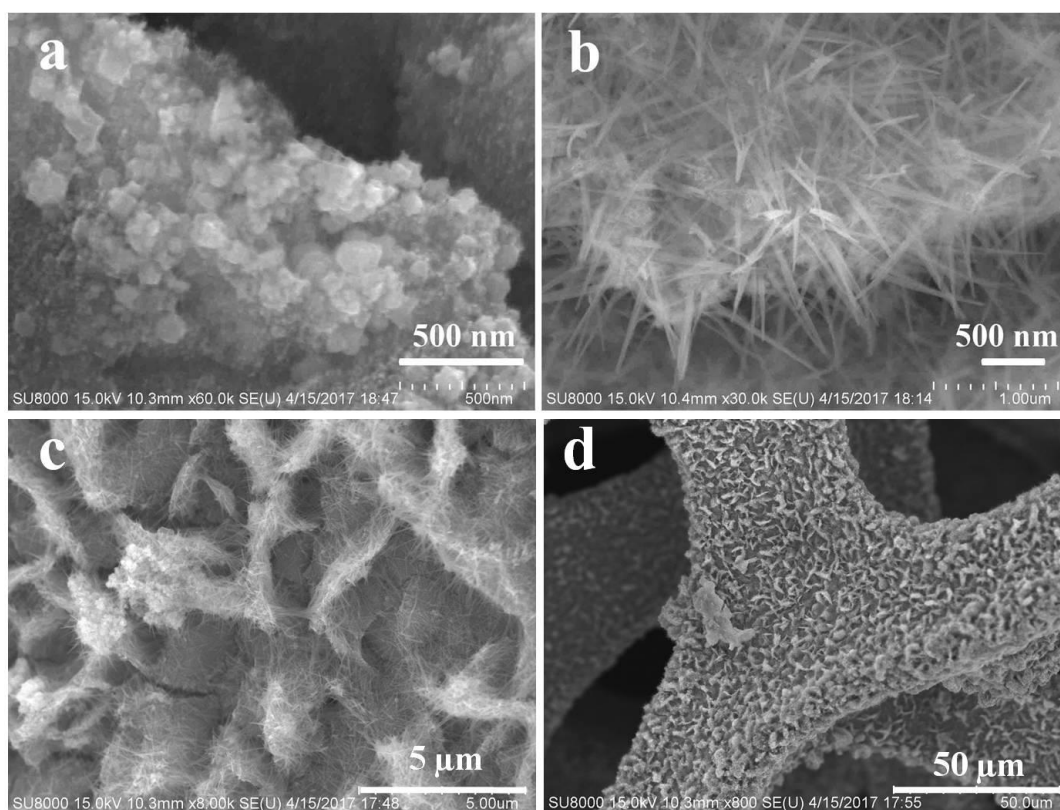

**Fig. S7** SEM images of CuNi/C electrode **a** before and **b, c, d** after activation

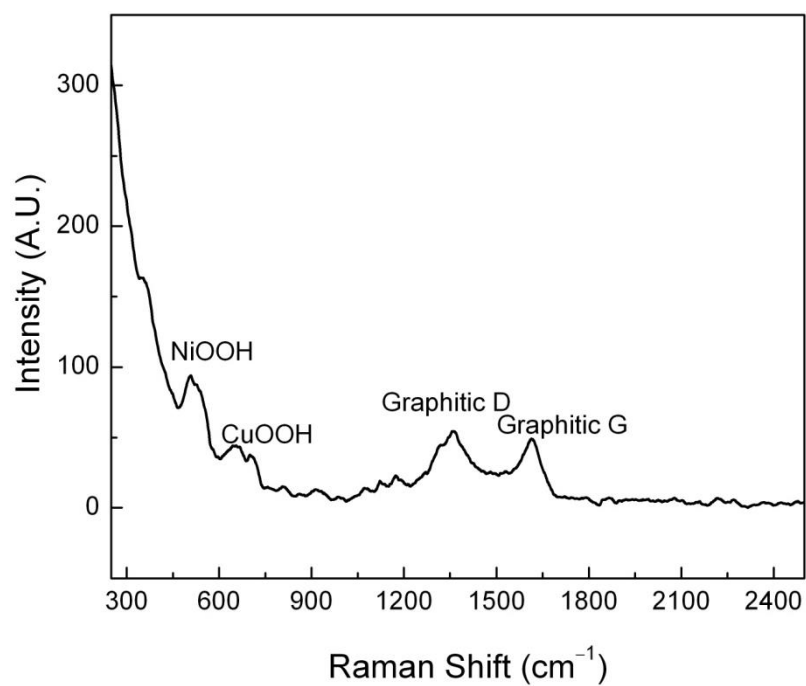

**Fig. S8** Raman spectra of activated CuNi/C electrodes

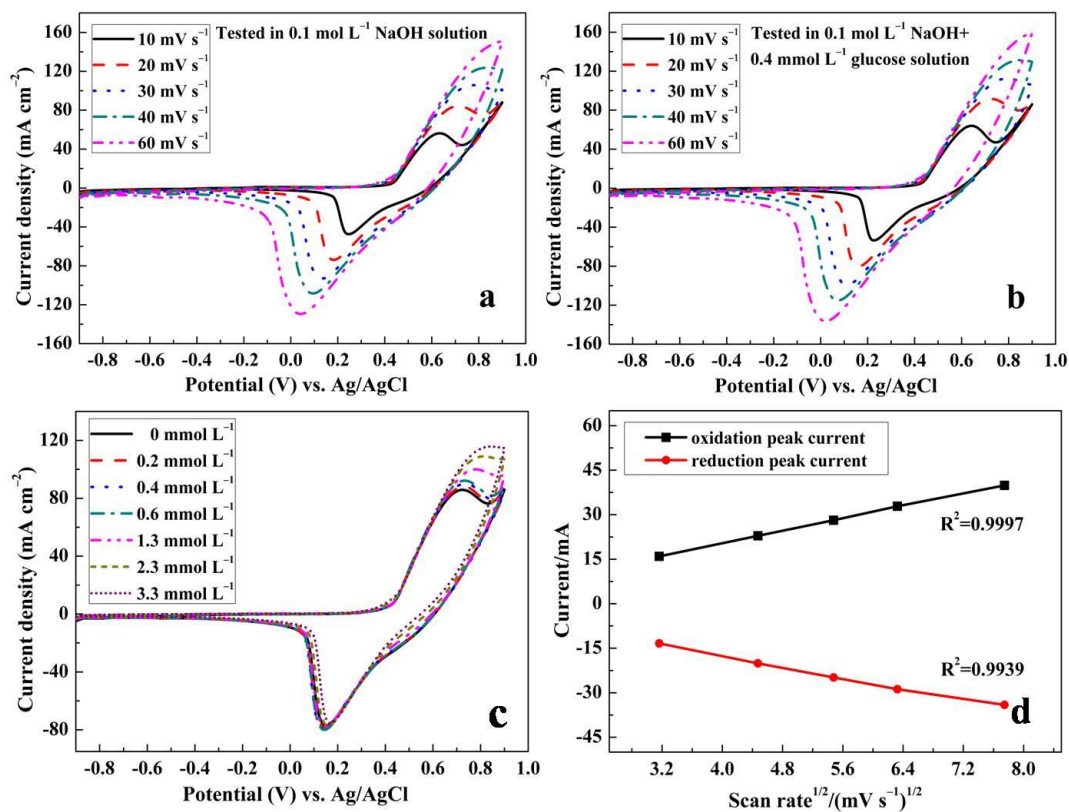

**Fig. S9** CV curves of activated CuNi/C electrodes with various scan rates in **a** 0.1 M NaOH and **b** 0.1 M NaOH + 0.4 mM glucose. **c** CV curves in 0.1 M NaOH with various concentrations of glucose at a scan rate of 20 mV s<sup>-1</sup>. **d** Linear plots of peak currents versus the square root of the scan rates

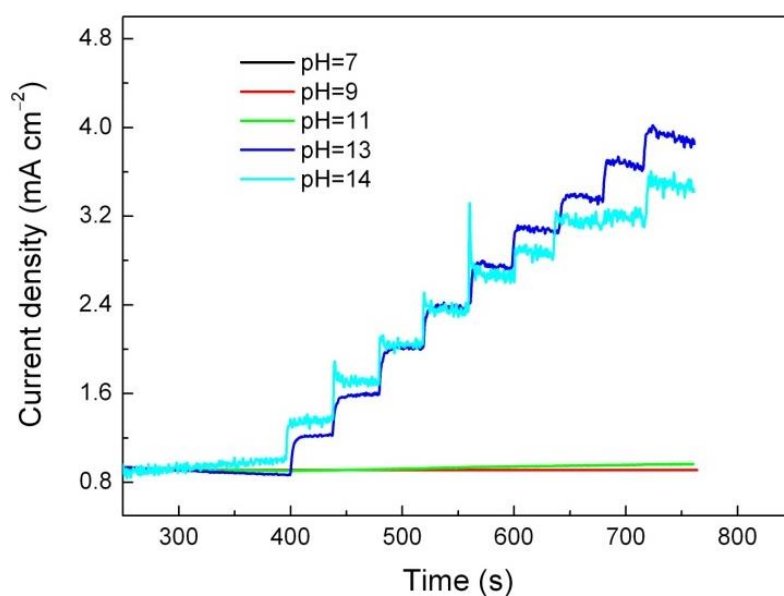

**Fig. S10** Amperometric responses of CuNi/C on the consecutive addition of 20 μM glucose into NaOH solution with different concentrations at 0.54 V

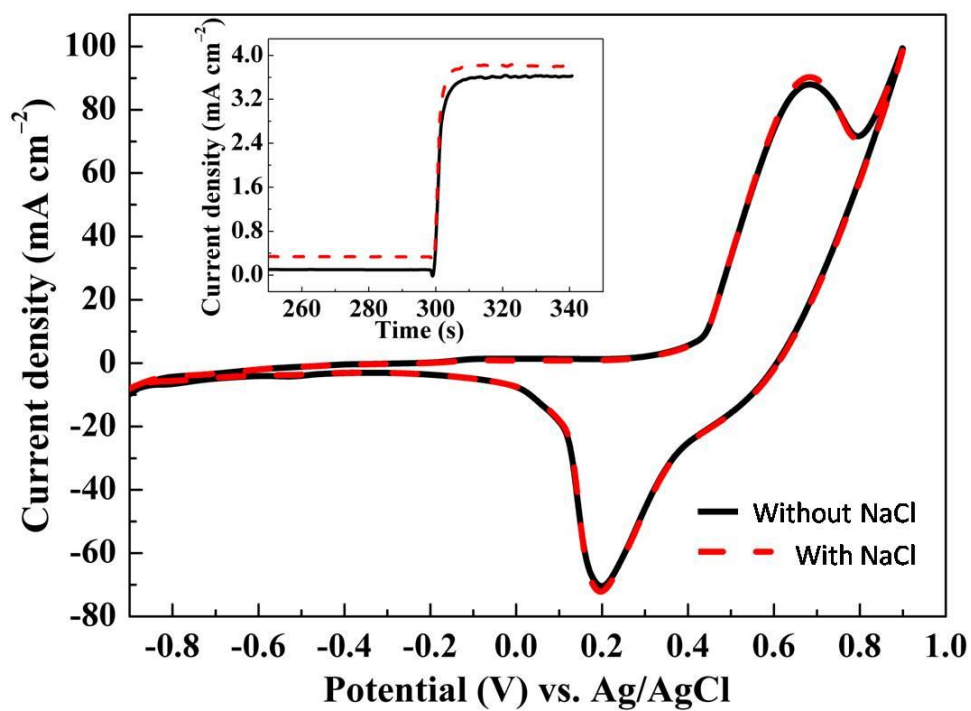

**Fig. S11** CVs of the CuNi/C electrodes containing 0.2 mM glucose with and without 20 mM NaCl in 0.1 M NaOH solution, the inset is the corresponding amperometric responses

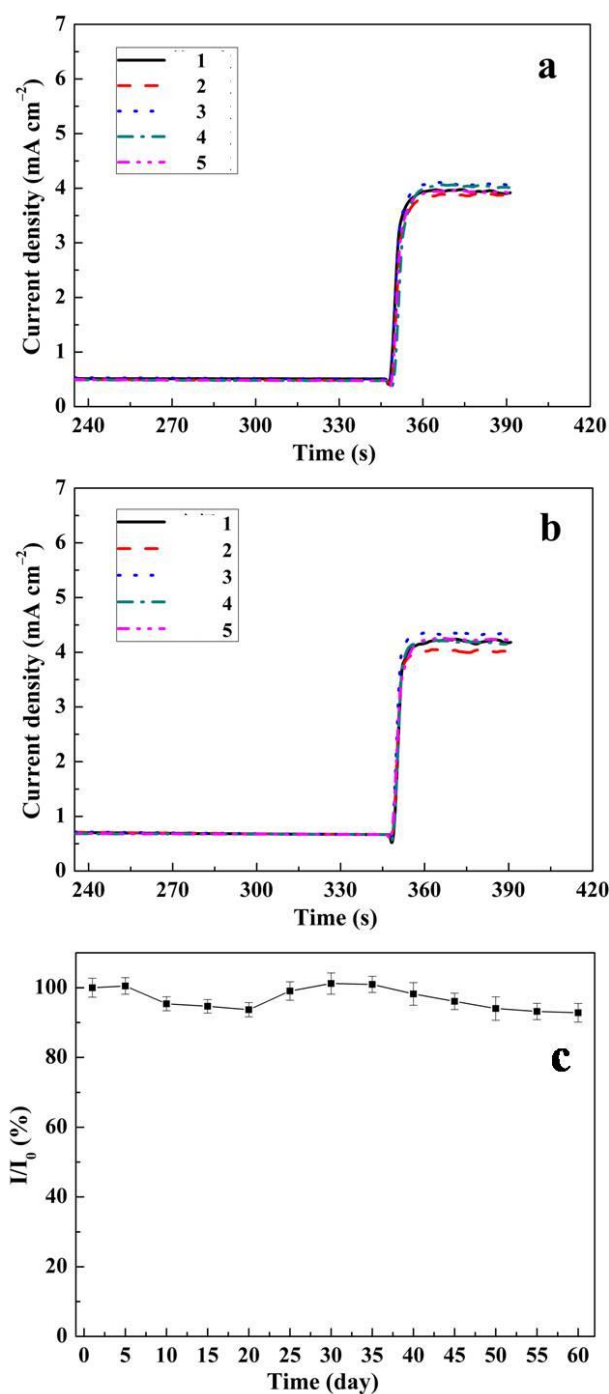

**Fig. S12** **a** Amperometric responses of an electrode to the addition of 0.2 mM glucose solution for respective five times. **b** Amperometric responses of five electrodes fabricated on the same condition to the addition of 0.2 mM glucose solution. **c** Long-term stability test of CuNi/C electrodes stored at room temperature over a 60-day period



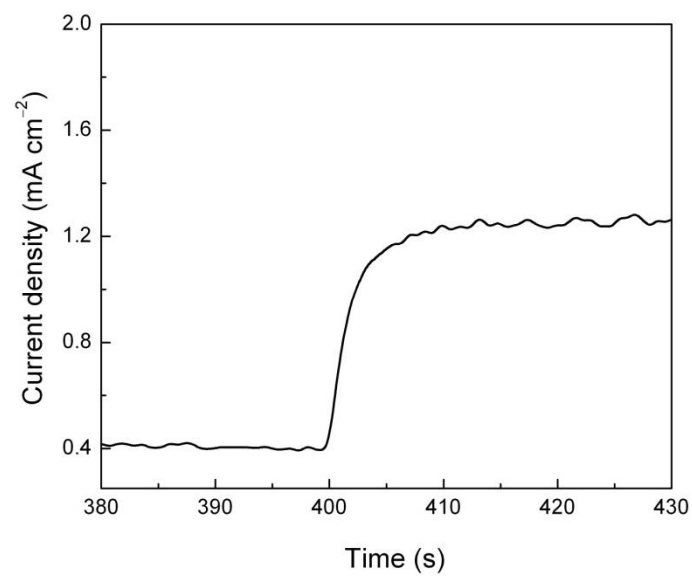

**Fig. S13** Amperometric response of CuNi/C electrodes upon serum sample 1 at 0.54V
